# Supplementary material for: Facile growth of Cu2O hollow cubes on reduced graphene oxide with remarkable electrocatalytic performance for non-enzymatic glucose detection
Source: Royal Society of Chemistry journal article supplement (doi:10.1039/c7nj01952a), 2017-01-01
Supplement: c7nj01952a1.pdf [file c7nj01952a1.pdf]

Electronic Supplementary Information (ESI) for

**Facile growth of Cu<sub>2</sub>O hollow cubes on reduced graphene oxide  
with remarkable electrocatalytic performance for non-enzymatic  
glucose detection**

Yuqin Wang,<sup>a</sup> Zhenyuan Ji,<sup>a\*</sup> Xiaoping Shen,<sup>a\*</sup> Guoxing Zhu,<sup>a</sup> Jiheng Wang,<sup>b</sup>  
Xiaoyang Yue<sup>a</sup>

<sup>a</sup> School of Chemistry and Chemical Engineering, Jiangsu University, Zhenjiang  
212013, P. R. China

<sup>b</sup> School of Material Science and Engineering, Jiangsu University of Science and  
Technology, Zhenjiang 212003, P. R. China

\*Corresponding author. E-mail: xiaopingshen@163.com

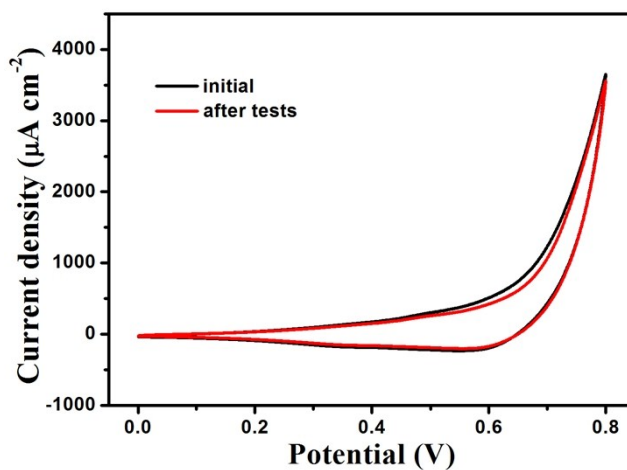

Fig. S1. CV curves of Cu<sub>2</sub>O/RGO-2 electrode before and after glucose detection in 0.1 M NaOH at scan rate of 50 mV s<sup>-1</sup>.

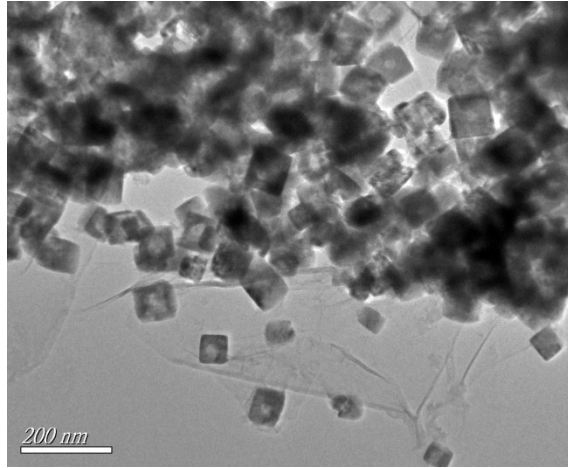

Fig. S2. TEM image of Cu<sub>2</sub>O/RGO-2 nanocomposite after the electrochemical measurements.
